# Supplementary material
Source: HighWire-hosted journal article supplement (https://rmdopen.bmj.com/content/2/1/e000159)

**Figure 1. Number of patients with frequencies of any interventions as result from the care pathway**

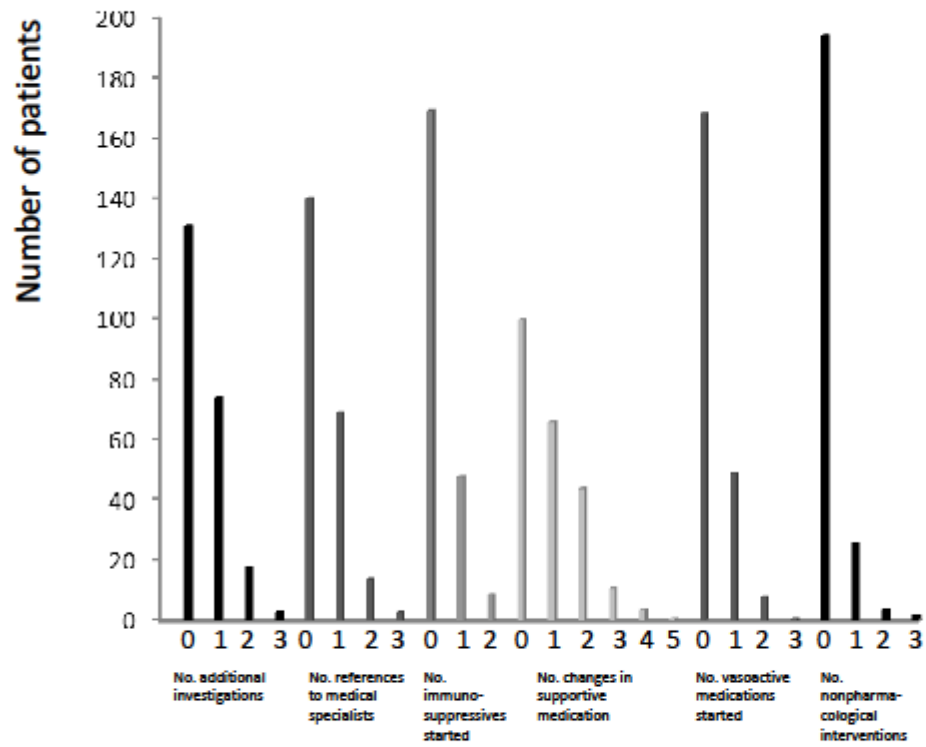

Supplement: inline-supplementary-material-2 [file inline-supplementary-material-2.pdf]
